# Supplementary material for: West Nile Virus Occurrence and Ecological Niche Modeling in Wild Bird Species and Mosquito Vectors: An Active Surveillance Program in the Peloponnese Region of Greece
Source: MDPI journal article supplement (doi:10.3390/microorganisms10071328), 2022-06-30
Supplement: s1 [file s1]

**Table S1.** Sample collection from wild bird species in Peloponnese Region during 2019–2020.

| Wild Bird Species |                               |                        | Migratory status  | Regional Units of Peloponnese Region |                            |                            |                              |         |          |
|-------------------|-------------------------------|------------------------|-------------------|--------------------------------------|----------------------------|----------------------------|------------------------------|---------|----------|
| No                | Scientific name               | Common name            |                   | Total                                | Argolida                   | Arcadia                    | Korinthia                    | Lakonia | Messinia |
| 1                 | <i>Alectoris graeca</i>       | Rock partridge         | Resident          | 1                                    | -                          | -                          | 1                            | -       | -        |
| 2                 | <i>Anas platyrhynchos</i>     | Mallard                | Partial migratory | 1                                    | 1                          | -                          | -                            | -       | -        |
| 3                 | <i>Apus apus</i>              | Common swift           | Migratory         | 1                                    | -                          | -                          | -                            | -       | 1        |
| 4                 | <i>Ardea purpurea</i>         | Purple heron           | Migratory         | 1                                    | -                          | -                          | -                            | -       | 1        |
| 5                 | <i>Athene noctua</i>          | Little owl             | Resident          | 1                                    | -                          | -                          | -                            | -       | 1        |
| 6                 | <i>Bubo bubo</i>              | Eurasian eagle-owl     | Resident          | 2                                    | -                          | -                          | -                            | -       | 2        |
| 7                 | <i>Buteo buteo</i>            | Common buzzard         | Partial migratory | 1                                    | -                          | -                          | -                            | -       | 1        |
| 8                 | <i>Columba livia</i>          | Rock dove              | Resident          | 2                                    | -                          | -                          | -                            | -       | 2        |
| 9                 | <i>Corvus cornix</i>          | Hooded crow            | Resident          | 11                                   | 1                          | 3                          | 1                            | 3       | 3        |
| 10                | <i>Corvus monedula</i>        | Jackdaw                | Resident          | 2                                    |                            | 2                          |                              | -       | -        |
| 11                | <i>Curruca communis</i>       | Common whitethroat     | Migratory         | 2                                    | -                          | 1                          | -                            | -       | 1        |
| 12                | <i>Curruca melanocephala</i>  | Sardinian warbler      | Resident          | 1                                    | -                          | -                          | -                            | -       | 1        |
| 13                | <i>Garrulus glandarius</i>    | Eurasian jay           | Resident          | 17                                   | 3                          | 6                          | 3                            | 4       | 1        |
| 14                | <i>Hirundo rustica</i>        | Barn swallow           | Migratory         | 1                                    | -                          | -                          | -                            | -       | 1        |
| 15                | <i>Larus michahellis</i>      | Yellow-legged gull     | Resident          | 1                                    | -                          | -                          | 1                            | -       | -        |
| 16                | <i>Parus major</i>            | Great tit              | Resident          | 9                                    | 1                          | 3                          | 1                            | -       | 4        |
| 17                | <i>Passer domesticus</i>      | House sparrow          | Resident          | 59<br>(58+1 <sup>D</sup> )           | -                          | 5                          | 26<br>(25+1 <sup>D</sup> )   | 16      | 12       |
| 18                | <i>Passer hispaniolensis</i>  | Spanish sparrow        | Partial migratory | 3                                    | -                          | -                          | -                            | -       | 3        |
| 19                | <i>Passer montanus</i>        | Eurasian tree sparrow  | Resident          | 4                                    | -                          | -                          | -                            | -       | 4        |
| 20                | <i>Phylloscopus collybita</i> | Common chiffchaff      | Partial migratory | 3                                    | -                          | 2                          | -                            | -       | 1        |
| 21                | <i>Pica pica</i>              | Eurasian magpie        | Resident          | 350<br>(339+11 <sup>D</sup> )        | 71<br>(70+3 <sup>D</sup> ) | 67<br>(65+2 <sup>D</sup> ) | 109<br>(104+6 <sup>D</sup> ) | 50      | 53       |
| 22                | <i>Streptopelia decaocto</i>  | Eurasian collared dove | Resident          | 3                                    | -                          | -                          | 3                            | -       | -        |
| 23                | <i>Strix aluco</i>            | Tawny owl              | Resident          | 1                                    | -                          | -                          | -                            | -       | 1        |
| 24                | <i>Turdus merula</i>          | Common blackbird       | Partial migratory | 14                                   | 1                          | 1                          | 2                            | 7       | 3        |
| 25                | <i>Turdus philomelos</i>      | Song thrush            | Migratory         | 2                                    | 1                          | -                          | -                            | 1       | -        |

<sup>D</sup> Wild birds found dead

**Table S2.** Collection sites of wild birds

| Bird Code | Year | Regional Unit | Region      | Species                    | PCR result | WGS84_X  | WGS84_Y  |
|-----------|------|---------------|-------------|----------------------------|------------|----------|----------|
| WB1       | 2019 | Argolida      | Inachos     | <i>Parus major</i>         | 0          | 22,82394 | 37,66967 |
| WB2       | 2019 | Argolida      | Argos       | <i>Pica pica</i>           | 0          | 22,74262 | 37,63296 |
| WB3       | 2019 | Argolida      | Monastiraki | <i>Pica pica</i>           | 0          | 22,75054 | 37,69997 |
| WB4       | 2019 | Argolida      | Koutsopodi  | <i>Pica pica</i>           | 0          | 22,72178 | 37,68528 |
| WB5       | 2019 | Argolida      | Neo Iraio   | <i>Pica pica</i>           | 0          | 22,76800 | 37,66681 |
| WB6       | 2019 | Argolida      | Argos       | <i>Pica pica</i>           | 0          | 22,70256 | 37,64525 |
| WB7       | 2019 | Argolida      | Limnes      | <i>Pica pica</i>           | 0          | 22,96747 | 37,77093 |
| WB8       | 2019 | Argolida      | Nea Kios    | <i>Pica pica</i>           | 0          | 22,74700 | 37,59200 |
| WB9       | 2019 | Argolida      | Karya       | <i>Pica pica</i>           | 0          | 22,62527 | 37,62620 |
| WB10      | 2019 | Argolida      | Inachos     | <i>Pica pica</i>           | 0          | 22,75500 | 37,66600 |
| WB11      | 2019 | Argolida      | Tirinha     | <i>Pica pica</i>           | 0          | 22,78500 | 37,60000 |
| WB12      | 2019 | Argolida      | Skafidaki   | <i>Pica pica</i>           | 0          | 22,71456 | 37,56978 |
| WB13      | 2019 | Argolida      | Koutsopodi  | <i>Pica pica</i>           | 0          | 22,87303 | 37,70910 |
| WB14      | 2019 | Argolida      | Fixti       | <i>Pica pica</i>           | 0          | 22,71944 | 37,72831 |
| WB15      | 2019 | Argolida      | Kranidi     | <i>Pica pica</i>           | 0          | 23,14200 | 37,38700 |
| WB16      | 2019 | Argolida      | Dimaina     | <i>Pica pica</i>           | 0          | 23,06700 | 37,69900 |
| WB17      | 2019 | Argolida      | Laloukas    | <i>Pica pica</i>           | 0          | 22,77800 | 37,62600 |
| WB18      | 2019 | Argolida      | Asini       | <i>Pica pica</i>           | 0          | 22,86805 | 37,55083 |
| WB19      | 2019 | Argolida      | Skafidaki   | <i>Pica pica</i>           | 0          | 22,67800 | 37,56400 |
| WB20      | 2019 | Argolida      | Tirinha     | <i>Garrulus glandarius</i> | 0          | 22,83500 | 37,61100 |
| WB21      | 2019 | Argolida      | Laloukas    | <i>Garrulus glandarius</i> | 0          | 22,79200 | 37,62900 |
| WB22      | 2019 | Argolida      | Laloukas    | <i>Garrulus glandarius</i> | 0          | 22,79200 | 37,61500 |
| WB23      | 2019 | Argolida      | Laloukas    | <i>Corvus cornix</i>       | 0          | 22,77875 | 37,63152 |
| WB24      | 2019 | Argolida      | Tirinha     | <i>Anas platyrhynchos</i>  | 0          | 22,80400 | 37,60300 |
| WB25      | 2019 | Arcadia       | Merkovouni  | <i>Pica pica</i>           | 0          | 22,37789 | 37,54395 |
| WB26      | 2019 | Arcadia       | Makri       | <i>Pica pica</i>           | 0          | 22,32539 | 37,47702 |
| WB27      | 2019 | Arcadia       | Asea        | <i>Pica pica</i>           | 0          | 22,28578 | 37,40671 |
| WB28      | 2019 | Arcadia       | Thana       | <i>Pica pica</i>           | 0          | 22,34800 | 37,47600 |
| WB29      | 2019 | Arcadia       | Ampelakia   | <i>Pica pica</i>           | 0          | 22,23319 | 37,39314 |
| WB30      | 2019 | Arcadia       | Nestani     | <i>Pica pica</i>           | 0          | 22,84415 | 37,61308 |
| WB31      | 2019 | Arcadia       | Makri       | <i>Pica pica</i>           | 0          | 22,46416 | 37,47844 |
| WB32      | 2019 | Arcadia       | Palladio    | <i>Pica pica</i>           | 0          | 22,35646 | 37,46296 |
| WB33      | 2019 | Arcadia       | Makri       | <i>Pica pica</i>           | 0          | 22,33595 | 37,46486 |
| WB34      | 2019 | Arcadia       | Ampelakia   | <i>Pica pica</i>           | 0          | 22,45391 | 37,60655 |
| WB35      | 2019 | Arcadia       | Arachamites | <i>Pica pica</i>           | 0          | 22,31644 | 37,46778 |
| WB36      | 2019 | Arcadia       | Asea        | <i>Pica pica</i>           | 0          | 22,24482 | 37,44717 |
| WB37      | 2019 | Arcadia       | Ampelakia   | <i>Pica pica</i>           | 0          | 22,29042 | 37,38400 |
| WB38      | 2019 | Arcadia       | Thana       | <i>Pica pica</i>           | 0          | 22,36200 | 37,47600 |
| WB39      | 2019 | Arcadia       | Thana       | <i>Pica pica</i>           | 0          | 22,37300 | 37,46300 |
| WB40      | 2019 | Arcadia       | Manari      | <i>Pica pica</i>           | 0          | 22,32500 | 37,40300 |
| WB41      | 2019 | Arcadia       | Nestani     | <i>Pica pica</i>           | 0          | 22,40400 | 37,59700 |
| WB42      | 2019 | Arcadia       | Thana       | <i>Pica pica</i>           | 0          | 22,34814 | 37,47601 |
| WB43      | 2019 | Arcadia       | Tripoli     | <i>Pica pica</i>           | 0          | 22,39700 | 37,51000 |
| WB44      | 2019 | Arcadia       | Astros      | <i>Pica pica</i>           | 0          | 22,75121 | 37,40374 |
| WB45      | 2019 | Arcadia       | Agiogritika | <i>Pica pica</i>           | 0          | 22,47000 | 37,49200 |
| WB46      | 2019 | Arcadia       | Silimni     | <i>Pica pica</i>           | 0          | 22,29900 | 37,51600 |
| WB47      | 2019 | Arcadia       | Thana       | <i>Pica pica</i>           | 0          | 22,39700 | 37,51000 |
| WB48      | 2019 | Arcadia       | Tripoli     | <i>Pica pica</i>           | 0          | 22,35300 | 37,50400 |
| WB49      | 2019 | Arcadia       | Tripoli     | <i>Pica pica</i>           | 0          | 22,36877 | 37,49269 |
| WB50      | 2019 | Arcadia       | Merkovouni  | <i>Pica pica</i>           | 0          | 22,37467 | 37,54819 |
| WB51      | 2019 | Arcadia       | Papari      | <i>Pica pica</i>           | 0          | 22,25954 | 37,37393 |

|       |      |           |                     |                              |   |          |          |
|-------|------|-----------|---------------------|------------------------------|---|----------|----------|
| WB52  | 2019 | Arcadia   | Xoremi              | <i>Pica pica</i>             | 0 | 22,07213 | 37,38248 |
| WB53  | 2019 | Arcadia   | Chrisovitsi         | <i>Corvus cornix</i>         | 0 | 22,23200 | 37,51000 |
| WB54  | 2019 | Arcadia   | Palladio            | <i>Corvus cornix</i>         | 0 | 22,35339 | 37,46354 |
| WB55  | 2019 | Arcadia   | Asea                | <i>Passer domesticus</i>     | 0 | 22,28021 | 37,40335 |
| WB56  | 2019 | Korinthia | Athikia             | <i>Pica pica</i>             | 0 | 22,98923 | 37,81015 |
| WB57  | 2019 | Korinthia | Galataki            | <i>Pica pica</i>             | 0 | 22,92916 | 37,81290 |
| WB58  | 2019 | Korinthia | Examilia            | <i>Pica pica</i>             | 0 | 22,95528 | 37,91738 |
| WB59  | 2019 | Korinthia | Assos               | <i>Pica pica</i>             | 0 | 22,83100 | 37,92600 |
| WB60  | 2019 | Korinthia | Examilia            | <i>Pica pica</i>             | 0 | 22,91100 | 37,87900 |
| WB61  | 2019 | Korinthia | Galataki            | <i>Pica pica</i>             | 0 | 22,97500 | 37,85300 |
| WB62  | 2019 | Korinthia | Solomos             | <i>Pica pica</i>             | 0 | 22,89705 | 37,88008 |
| WB63  | 2019 | Korinthia | Isthmia             | <i>Streptopelia decaocto</i> | 0 | 23,00517 | 37,90434 |
| WB64  | 2019 | Korinthia | Athikia             | <i>Pica pica</i>             | 0 | 22,97966 | 37,86447 |
| WB65  | 2019 | Korinthia | Galataki            | <i>Pica pica</i>             | 0 | 22,98923 | 37,86653 |
| WB66  | 2019 | Korinthia | Ancient Korinthus   | <i>Pica pica</i>             | 0 | 22,94831 | 37,91257 |
| WB67  | 2019 | Korinthia | Loutraki-Petrachora | <i>Pica pica</i>             | 0 | 23,01525 | 37,96149 |
| WB68  | 2019 | Korinthia | Xilokastro          | <i>Pica pica</i>             | 0 | 22,62880 | 38,07042 |
| WB69  | 2019 | Korinthia | Galataki            | <i>Pica pica</i>             | 0 | 22,77678 | 37,86997 |
| WB70  | 2019 | Korinthia | Xilokeriza          | <i>Pica pica</i>             | 0 | 22,94300 | 37,87700 |
| WB71  | 2019 | Korinthia | Xilokeriza          | <i>Pica pica</i>             | 0 | 22,94900 | 37,87700 |
| WB72  | 2019 | Korinthia | Sikiona             | <i>Pica pica</i>             | 0 | 22,71600 | 37,98400 |
| WB73  | 2019 | Korinthia | Examilia            | <i>Pica pica</i>             | 0 | 22,95533 | 37,91419 |
| WB74  | 2019 | Korinthia | Korinthus           | <i>Pica pica</i>             | 0 | 22,83325 | 37,92946 |
| WB75  | 2019 | Korinthia | Examilia            | <i>Pica pica</i>             | 0 | 22,94691 | 37,91250 |
| WB76  | 2019 | Korinthia | Korinthus           | <i>Pica pica</i>             | 0 | 22,94893 | 37,92685 |
| WB77  | 2019 | Korinthia | Examilia            | <i>Pica pica</i>             | 0 | 22,94888 | 37,91258 |
| WB78  | 2019 | Korinthia | Velos               | <i>Pica pica</i>             | 0 | 22,75700 | 37,98278 |
| WB79  | 2019 | Korinthia | Zeugolatio          | <i>Pica pica</i>             | 0 | 22,79565 | 37,92201 |
| WB80  | 2019 | Korinthia | Xilokeriza          | <i>Pica pica</i>             | 0 | 22,87082 | 37,90433 |
| WB81  | 2019 | Korinthia | Examilia            | <i>Pica pica</i>             | 0 | 22,95062 | 37,91188 |
| WB82  | 2019 | Korinthia | Galataki            | <i>Pica pica</i>             | 0 | 22,97600 | 37,84900 |
| WB83  | 2019 | Korinthia | Xilokeriza          | <i>Pica pica</i>             | 0 | 22,99137 | 37,86143 |
| WB84  | 2019 | Korinthia | Examilia            | <i>Pica pica</i>             | 0 | 22,94678 | 37,91308 |
| WB85  | 2019 | Korinthia | Examilia            | <i>Pica pica</i>             | 0 | 22,95062 | 37,91188 |
| WB86  | 2019 | Korinthia | Examilia            | <i>Pica pica</i>             | 0 | 22,94900 | 37,91300 |
| WB87  | 2019 | Korinthia | Korinthus           | <i>Pica pica</i>             | 0 | 22,94261 | 37,92566 |
| WB88  | 2019 | Korinthia | Korinthus           | <i>Pica pica</i>             | 0 | 22,94510 | 37,92356 |
| WB89  | 2019 | Korinthia | Xilokeriza          | <i>Pica pica</i>             | 0 | 22,94734 | 37,88049 |
| WB90  | 2019 | Korinthia | Galataki            | <i>Pica pica</i>             | 0 | 22,99451 | 37,84710 |
| WB91  | 2019 | Korinthia | Kefalari            | <i>Pica pica</i>             | 0 | 22,53400 | 37,91900 |
| WB92  | 2019 | Korinthia | Sikiona             | <i>Pica pica</i>             | 0 | 22,72807 | 37,98475 |
| WB93  | 2019 | Korinthia | Assos               | <i>Pica pica</i>             | 0 | 22,81503 | 37,93655 |
| WB94  | 2019 | Korinthia | Xilokeriza          | <i>Pica pica</i>             | 0 | 22,94734 | 37,88049 |
| WB95  | 2019 | Korinthia | Ancient Nemea       | <i>Garrulus glandarius</i>   | 0 | 22,72194 | 37,80857 |
| WB96  | 2019 | Korinthia | Chiliomodi          | <i>Garrulus glandarius</i>   | 0 | 22,81007 | 37,82497 |
| WB97  | 2019 | Korinthia | Zeugolatio          | <i>Turdus merula</i>         | 0 | 22,94918 | 37,87547 |
| WB98  | 2019 | Korinthia | Goura               | <i>Corvus cornix</i>         | 0 | 22,33400 | 37,92500 |
| WB99  | 2019 | Korinthia | Sarantapicho        | <i>Alectoris chukar</i>      | 0 | 22,36553 | 38,03218 |
| WB100 | 2019 | Lakonia   | Klada               | <i>Pica pica</i>             | 0 | 22,41968 | 37,10822 |
| WB101 | 2019 | Lakonia   | Sparti              | <i>Pica pica</i>             | 0 | 22,42390 | 37,09762 |
| WB102 | 2019 | Lakonia   | Neapoli             | <i>Pica pica</i>             | 0 | 23,06700 | 36,50700 |

|       |      |          |                         |                          |   |          |          |
|-------|------|----------|-------------------------|--------------------------|---|----------|----------|
| WB103 | 2019 | Lakonia  | Geraki                  | <i>Pica pica</i>         | 0 | 22,70200 | 36,98300 |
| WB104 | 2019 | Lakonia  | Agios Dimitrios Zarakos | <i>Pica pica</i>         | 0 | 22,81500 | 36,94100 |
| WB105 | 2019 | Lakonia  | Asteri                  | <i>Pica pica</i>         | 0 | 22,75200 | 36,80900 |
| WB106 | 2019 | Lakonia  | Skala                   | <i>Pica pica</i>         | 0 | 22,66200 | 36,86000 |
| WB107 | 2019 | Lakonia  | Sparti                  | <i>Pica pica</i>         | 0 | 22,42700 | 37,03300 |
| WB108 | 2019 | Lakonia  | Krokees                 | <i>Pica pica</i>         | 0 | 22,55300 | 36,88900 |
| WB109 | 2019 | Lakonia  | Peristeri               | <i>Pica pica</i>         | 0 | 22,66600 | 36,87900 |
| WB110 | 2019 | Lakonia  | Papadianika             | <i>Pica pica</i>         | 0 | 22,86500 | 36,72900 |
| WB111 | 2019 | Lakonia  | Vlachioti               | <i>Pica pica</i>         | 0 | 22,71900 | 36,85800 |
| WB112 | 2019 | Lakonia  | Peristeri               | <i>Pica pica</i>         | 0 | 22,67516 | 36,85939 |
| WB113 | 2019 | Lakonia  | Asteri                  | <i>Pica pica</i>         | 0 | 22,73472 | 36,82668 |
| WB114 | 2019 | Lakonia  | Asteri                  | <i>Turdus merula</i>     | 0 | 22,74700 | 36,81000 |
| WB115 | 2019 | Lakonia  | Platanos                | <i>Corvus cornix</i>     | 0 | 22,48700 | 36,77700 |
| WB116 | 2019 | Lakonia  | Elaia                   | <i>Corvus cornix</i>     | 0 | 22,81700 | 36,74900 |
| WB117 | 2019 | Messinia | Messini                 | <i>Pica pica</i>         | 0 | 21,99898 | 37,05576 |
| WB118 | 2019 | Messinia | Verga                   | <i>Pica pica</i>         | 0 | 22,16140 | 37,00989 |
| WB119 | 2019 | Messinia | Loggas                  | <i>Pica pica</i>         | 0 | 21,91037 | 36,86449 |
| WB120 | 2019 | Messinia | Verga                   | <i>Pica pica</i>         | 0 | 22,15700 | 37,01200 |
| WB121 | 2019 | Messinia | Valira                  | <i>Pica pica</i>         | 0 | 21,98400 | 37,15700 |
| WB122 | 2019 | Messinia | Verga                   | <i>Pica pica</i>         | 0 | 22,16500 | 36,98700 |
| WB123 | 2019 | Messinia | Messini                 | <i>Pica pica</i>         | 0 | 21,98200 | 37,04200 |
| WB124 | 2019 | Messinia | Messini                 | <i>Pica pica</i>         | 0 | 21,97600 | 37,05200 |
| WB125 | 2019 | Messinia | Karteroli               | <i>Pica pica</i>         | 0 | 21,98500 | 37,07900 |
| WB126 | 2019 | Messinia | Xirokampos              | <i>Pica pica</i>         | 0 | 21,68400 | 37,22400 |
| WB127 | 2019 | Messinia | Kopanaki                | <i>Pica pica</i>         | 0 | 21,81200 | 37,28100 |
| WB128 | 2019 | Messinia | Dorio                   | <i>Pica pica</i>         | 0 | 21,84900 | 37,29600 |
| WB129 | 2019 | Messinia | Valira                  | <i>Pica pica</i>         | 0 | 21,98300 | 37,17700 |
| WB130 | 2019 | Messinia | Platea                  | <i>Pica pica</i>         | 0 | 22,01600 | 37,15900 |
| WB131 | 2019 | Messinia | Lampaini                | <i>Pica pica</i>         | 0 | 21,96800 | 37,15400 |
| WB132 | 2019 | Messinia | Mauromati Pamisou       | <i>Pica pica</i>         | 0 | 21,99100 | 37,06800 |
| WB133 | 2019 | Messinia | Messini                 | <i>Pica pica</i>         | 0 | 21,97872 | 37,05209 |
| WB134 | 2019 | Messinia | Loggas                  | <i>Pica pica</i>         | 0 | 21,91400 | 36,86000 |
| WB135 | 2019 | Messinia | Kompoi                  | <i>Pica pica</i>         | 0 | 21,92200 | 36,82200 |
| WB136 | 2019 | Messinia | Evangelismos            | <i>Pica pica</i>         | 0 | 21,77700 | 36,81700 |
| WB137 | 2019 | Messinia | Psariou                 | <i>Pica pica</i>         | 0 | 21,87500 | 37,32200 |
| WB138 | 2019 | Messinia | Karteroli               | <i>Pica pica</i>         | 0 | 21,98381 | 37,08021 |
| WB139 | 2019 | Messinia | Loggas                  | <i>Pica pica</i>         | 0 | 21,89941 | 36,87285 |
| WB140 | 2019 | Messinia | Kyparissia              | <i>Pica pica</i>         | 0 | 21,66012 | 37,23522 |
| WB141 | 2019 | Messinia | Mauromati Pamisou       | <i>Pica pica</i>         | 0 | 21,99138 | 37,06250 |
| WB142 | 2019 | Messinia | Arfara                  | <i>Corvus cornix</i>     | 0 | 22,50709 | 37,17230 |
| WB143 | 2019 | Messinia | Arfara                  | <i>Corvus cornix</i>     | 0 | 22,04288 | 37,15022 |
| WB144 | 2019 | Messinia | Asprochoma              | <i>Passer domesticus</i> | 0 | 22,07600 | 37,04700 |
| WB145 | 2020 | Argolida | Mili                    | <i>Pica pica</i>         | 0 | 22,95823 | 37,55128 |
| WB146 | 2020 | Argolida | Iria                    | <i>Pica pica</i>         | 0 | 22,69547 | 37,53325 |
| WB147 | 2020 | Argolida | Drepano                 | <i>Pica pica</i>         | 0 | 22,40149 | 37,59628 |
| WB148 | 2020 | Argolida | Nea Tirintha            | <i>Pica pica</i>         | 0 | 22,63983 | 37,61765 |
| WB149 | 2020 | Argolida | Fregeni                 | <i>Pica pica</i>         | 0 | 22,64633 | 37,62223 |
| WB150 | 2020 | Argolida | Karia                   | <i>Pica pica</i>         | 0 | 22,57521 | 37,64342 |
| WB151 | 2020 | Argolida | Dalamanara              | <i>Pica pica</i>         | 0 | 22,64200 | 37,62900 |

|       |      |          |               |                             |   |          |          |
|-------|------|----------|---------------|-----------------------------|---|----------|----------|
| WB152 | 2020 | Argolida | Anifi         | <i>Pica pica</i>            | 0 | 22,74741 | 37,66682 |
| WB153 | 2020 | Argolida | Mideas        | <i>Pica pica</i>            | 0 | 22,69831 | 37,70110 |
| WB154 | 2020 | Argolida | Koutsopodi    | <i>Pica pica</i>            | 0 | 22,84294 | 37,66681 |
| WB155 | 2020 | Argolida | Kiveri        | <i>Turdus merula</i>        | 0 | 22,80818 | 37,64907 |
| WB156 | 2020 | Argolida | Limnes        | <i>Turdus philomelos</i>    | 0 | 22,81152 | 37,64532 |
| WB157 | 2020 | Argolida | Malandreni    | <i>Pica pica</i>            | 0 | 22,81003 | 37,64718 |
| WB158 | 2020 | Argolida | Karia         | <i>Pica pica</i>            | 0 | 22,64200 | 37,62900 |
| WB159 | 2020 | Argolida | Mili          | <i>Pica pica</i>            | 0 | 22,69547 | 37,53325 |
| WB160 | 2020 | Argolida | Mideas        | <i>Pica pica</i>            | 0 | 22,69831 | 37,70110 |
| WB161 | 2020 | Argolida | Koutsopodi    | <i>Pica pica</i>            | 0 | 22,70900 | 37,70200 |
| WB162 | 2020 | Argolida | Argos         | <i>Pica pica</i>            | 0 | 22,74262 | 37,63296 |
| WB163 | 2020 | Argolida | Nea Tirintha  | <i>Pica pica</i>            | 0 | 22,81655 | 37,61094 |
| WB164 | 2020 | Argolida | Argos         | <i>Pica pica</i>            | 0 | 22,72344 | 37,64966 |
| WB165 | 2020 | Argolida | Karia         | <i>Pica pica</i>            | 0 | 22,77845 | 37,62623 |
| WB166 | 2020 | Argolida | Epidavros     | <i>Pica pica</i>            | 0 | 23,12927 | 37,62606 |
| WB167 | 2020 | Argolida | Dalamanara    | <i>Pica pica</i>            | 1 | 22,78048 | 37,61466 |
| WB168 | 2020 | Argolida | Dalamanara    | <i>Pica pica</i>            | 0 | 22,77904 | 37,61506 |
| WB169 | 2020 | Argolida | Poulakida     | <i>Pica pica</i>            | 1 | 22,77048 | 37,61933 |
| WB170 | 2020 | Argolida | Dalamanara    | <i>Pica pica</i>            | 0 | 22,77048 | 37,61933 |
| WB171 | 2020 | Argolida | Mideas        | <i>Pica pica</i>            | 0 | 22,84294 | 37,66681 |
| WB172 | 2020 | Argolida | Mideas        | <i>Pica pica</i>            | 0 | 22,80818 | 37,64907 |
| WB173 | 2020 | Argolida | Mideas        | <i>Pica pica</i>            | 0 | 22,80818 | 37,64907 |
| WB174 | 2020 | Argolida | Dalamanara    | <i>Pica pica</i>            | 1 | 22,78052 | 37,61446 |
| WB175 | 2020 | Argolida | Dalamanara    | <i>Pica pica</i>            | 1 | 22,78068 | 37,61422 |
| WB176 | 2020 | Argolida | Dalamanara    | <i>Pica pica</i>            | 1 | 22,76308 | 37,61958 |
| WB177 | 2020 | Argolida | Dalamanara    | <i>Pica pica</i>            | 1 | 22,76313 | 37,61957 |
| WB178 | 2020 | Argolida | Dalamanara    | <i>Pica pica</i>            | 1 | 22,76394 | 37,61933 |
| WB179 | 2020 | Argolida | Dalamanara    | <i>Pica pica</i>            | 1 | 22,76214 | 37,61927 |
| WB180 | 2020 | Argolida | Poulakida     | <i>Pica pica</i>            | 1 | 22,80747 | 37,64834 |
| WB181 | 2020 | Argolida | Poulakida     | <i>Pica pica</i>            | 1 | 22,80747 | 37,64834 |
| WB182 | 2020 | Argolida | Poulakida     | <i>Pica pica</i>            | 1 | 22,80863 | 37,64532 |
| WB183 | 2020 | Argolida | Poulakida     | <i>Pica pica</i>            | 1 | 22,80863 | 37,64532 |
| WB184 | 2020 | Argolida | Fichti        | <i>Pica pica</i>            | 0 | 22,73045 | 37,72247 |
| WB185 | 2020 | Argolida | Fichti        | <i>Pica pica</i>            | 0 | 22,73000 | 37,75500 |
| WB186 | 2020 | Argolida | Fichti        | <i>Pica pica</i>            | 0 | 22,71920 | 37,72951 |
| WB187 | 2020 | Argolida | Drepanos      | <i>Pica pica</i>            | 0 | 22,89197 | 37,53564 |
| WB188 | 2020 | Argolida | Kefalari      | <i>Pica pica</i>            | 0 | 22,67633 | 37,59008 |
| WB189 | 2020 | Argolida | Dalamanara    | <i>Pica pica</i>            | 0 | 22,76587 | 37,62585 |
| WB190 | 2020 | Argolida | Dalamanara    | <i>Pica pica</i>            | 0 | 22,77357 | 37,61337 |
| WB191 | 2020 | Argolida | Anifi         | <i>Pica pica</i>            | 0 | 22,78478 | 37,65931 |
| WB192 | 2020 | Argolida | Koutsopodi    | <i>Pica pica</i>            | 0 | 22,69485 | 37,68709 |
| WB193 | 2020 | Argolida | Argos         | <i>Pica pica</i>            | 0 | 22,74598 | 37,62732 |
| WB194 | 2020 | Argolida | Laloukas      | <i>Pica pica</i>            | 0 | 22,77805 | 37,63255 |
| WB195 | 2020 | Argolida | Mideas        | <i>Pica pica</i>            | 0 | 22,80818 | 37,64907 |
| WB196 | 2020 | Argolida | Mideas        | <i>Pica pica</i>            | 0 | 22,80818 | 37,64907 |
| WB197 | 2020 | Argolida | Koutsopodi    | <i>Pica pica</i>            | 0 | 22,72261 | 37,69029 |
| WB198 | 2020 | Argolida | Koutsopodi    | <i>Pica pica</i>            | 0 | 22,71823 | 37,66945 |
| WB199 | 2020 | Argolida | Inachos       | <i>Pica pica</i>            | 0 | 22,82394 | 37,66967 |
| WB200 | 2020 | Arcadia  | Asea          | <i>Corvus corone cornix</i> | 0 | 22,28311 | 37,40891 |
| WB201 | 2020 | Arcadia  | Vlachokerasia | <i>Pica pica</i>            | 0 | 22,30570 | 37,36610 |
| WB202 | 2020 | Arcadia  | Ampelakia     | <i>Pica pica</i>            | 0 | 22,35486 | 37,38021 |
| WB203 | 2020 | Arcadia  | Athinaion     | <i>Pica pica</i>            | 0 | 22,24035 | 37,39669 |
| WB204 | 2020 | Arcadia  | Athinaion     | <i>Pica pica</i>            | 0 | 22,37553 | 37,40807 |
| WB205 | 2020 | Arcadia  | Kandalos      | <i>Pica pica</i>            | 0 | 22,26631 | 37,42798 |

|       |      |           |                    |                               |   |          |          |
|-------|------|-----------|--------------------|-------------------------------|---|----------|----------|
| WB206 | 2020 | Arcadia   | Arachamites        | <i>Pica pica</i>              | 0 | 22,35805 | 37,61303 |
| WB207 | 2020 | Arcadia   | Makri              | <i>Pica pica</i>              | 0 | 22,33528 | 37,46493 |
| WB208 | 2020 | Arcadia   | Lithovounia        | <i>Pica pica</i>              | 0 | 22,40865 | 37,49620 |
| WB209 | 2020 | Arcadia   | Neochori           | <i>Pica pica</i>              | 0 | 22,38448 | 37,50046 |
| WB210 | 2020 | Arcadia   | Tripoli            | <i>Pica pica</i>              | 0 | 22,37399 | 37,49490 |
| WB211 | 2020 | Arcadia   | Nestani            | <i>Pica pica</i>              | 0 | 22,35483 | 37,50313 |
| WB212 | 2020 | Arcadia   | Makri              | <i>Turdus merula</i>          | 0 | 22,33231 | 37,46184 |
| WB213 | 2020 | Arcadia   | Perivolia          | <i>Corvus monedula</i>        | 0 | 22,16494 | 37,37957 |
| WB214 | 2020 | Arcadia   | Megalopolis        | <i>Corvus monedula</i>        | 1 | 22,16596 | 37,38540 |
| WB215 | 2020 | Arcadia   | Merkovouni         | <i>Garrulus glandarius</i>    | 0 | 22,37989 | 37,53723 |
| WB216 | 2020 | Arcadia   | Vlachokerasia      | <i>Garrulus glandarius</i>    | 0 | 22,35486 | 37,38021 |
| WB217 | 2020 | Arcadia   | Tripoli            | <i>Garrulus glandarius</i>    | 0 | 22,35483 | 37,50313 |
| WB218 | 2020 | Arcadia   | Megalopolis        | <i>Garrulus glandarius</i>    | 0 | 22,12596 | 37,40609 |
| WB219 | 2020 | Arcadia   | Tripoli            | <i>Garrulus glandarius</i>    | 1 | 22,41781 | 37,50735 |
| WB220 | 2020 | Arcadia   | Paparis            | <i>Garrulus glandarius</i>    | 0 | 22,25768 | 37,37093 |
| WB221 | 2020 | Arcadia   | Tripoli            | <i>Parus major</i>            | 0 | 22,36839 | 37,53110 |
| WB222 | 2020 | Arcadia   | Tripoli            | <i>Parus major</i>            | 0 | 22,36819 | 37,53113 |
| WB223 | 2020 | Arcadia   | Thana              | <i>Parus major</i>            | 0 | 22,36140 | 37,47445 |
| WB224 | 2020 | Arcadia   | Rizes              | <i>Passer domesticus</i>      | 0 | 22,46695 | 37,43924 |
| WB225 | 2020 | Arcadia   | Asea               | <i>Passer domesticus</i>      | 0 | 22,29021 | 37,40460 |
| WB226 | 2020 | Arcadia   | Vervena            | <i>Passer domesticus</i>      | 0 | 22,73675 | 37,43474 |
| WB227 | 2020 | Arcadia   | Tripoli            | <i>Passer domesticus</i>      | 0 | 22,41530 | 37,52437 |
| WB228 | 2020 | Arcadia   | Tripoli            | <i>Phylloscopus collybita</i> | 0 | 22,34728 | 37,47757 |
| WB229 | 2020 | Arcadia   | Tripoli            | <i>Phylloscopus collybita</i> | 0 | 22,41441 | 37,52421 |
| WB230 | 2020 | Arcadia   | Nestani            | <i>Pica pica</i>              | 0 | 22,46532 | 37,61943 |
| WB231 | 2020 | Arcadia   | Loukas             | <i>Pica pica</i>              | 0 | 22,40677 | 37,59155 |
| WB232 | 2020 | Arcadia   | Kapsa              | <i>Pica pica</i>              | 0 | 22,35805 | 37,61303 |
| WB233 | 2020 | Arcadia   | Thana              | <i>Pica pica</i>              | 0 | 22,36736 | 37,47067 |
| WB234 | 2020 | Arcadia   | Ampelakia          | <i>Pica pica</i>              | 0 | 22,28546 | 37,38454 |
| WB235 | 2020 | Arcadia   | Megalopolis        | <i>Pica pica</i>              | 0 | 22,14525 | 37,39412 |
| WB236 | 2020 | Arcadia   | Tripoli            | <i>Pica pica</i>              | 0 | 22,28103 | 37,38503 |
| WB237 | 2020 | Arcadia   | Tripoli            | <i>Pica pica</i>              | 0 | 22,28413 | 37,39806 |
| WB238 | 2020 | Arcadia   | Steno              | <i>Pica pica</i>              | 0 | 22,46340 | 37,49285 |
| WB239 | 2020 | Arcadia   | Asea               | <i>Pica pica</i>              | 1 | 22,27892 | 37,38905 |
| WB240 | 2020 | Arcadia   | Astros             | <i>Pica pica</i>              | 0 | 22,69200 | 37,41400 |
| WB241 | 2020 | Arcadia   | Pelagos            | <i>Pica pica</i>              | 0 | 22,42667 | 37,52058 |
| WB242 | 2020 | Arcadia   | Tripoli            | <i>Pica pica</i>              | 1 | 22,41502 | 37,50942 |
| WB243 | 2020 | Arcadia   | Tripoli            | <i>Pica pica</i>              | 1 | 22,26011 | 37,38603 |
| WB244 | 2020 | Arcadia   | Tripoli            | <i>Pica pica</i>              | 0 | 22,27931 | 37,35693 |
| WB245 | 2020 | Arcadia   | Tripoli            | <i>Pica pica</i>              | 0 | 22,33672 | 37,46628 |
| WB246 | 2020 | Arcadia   | Tripoli            | <i>Pica pica</i>              | 0 | 22,33025 | 37,46787 |
| WB247 | 2020 | Arcadia   | Tripoli            | <i>Pica pica</i>              | 0 | 22,66943 | 37,51235 |
| WB248 | 2020 | Arcadia   | Tripoli            | <i>Pica pica</i>              | 0 | 22,38506 | 37,50168 |
| WB249 | 2020 | Arcadia   | Tripoli            | <i>Pica pica</i>              | 0 | 22,41441 | 37,52421 |
| WB250 | 2020 | Arcadia   | Monastiraki        | <i>Pica pica</i>              | 0 | 22,75251 | 37,70680 |
| WB251 | 2020 | Arcadia   | Monastiraki        | <i>Pica pica</i>              | 0 | 22,75471 | 37,70573 |
| WB252 | 2020 | Arcadia   | Agios Vasileios    | <i>Pica pica</i>              | 0 | 22,42067 | 37,51089 |
| WB253 | 2020 | Arcadia   | Dafni              | <i>Pica pica</i>              | 0 | 22,27657 | 37,36417 |
| WB254 | 2020 | Arcadia   | Athinaion          | <i>Pica pica</i>              | 0 | 22,24317 | 37,40195 |
| WB255 | 2020 | Arcadia   | Doriza             | <i>Pica pica</i>              | 0 | 22,29800 | 37,43963 |
| WB256 | 2020 | Arcadia   | Makri              | <i>Pica pica</i>              | 0 | 22,32934 | 37,46919 |
| WB257 | 2020 | Arcadia   | Agios Konstantinos | <i>Pica pica</i>              | 0 | 22,39322 | 37,52041 |
| WB258 | 2020 | Arcadia   | Tripolis           | <i>Curruca communis</i>       | 0 | 22,41521 | 37,59541 |
| WB259 | 2020 | Korinthia | Agios Ioannis      | <i>Pica pica</i>              | 0 | 22,96537 | 37,77751 |

|       |      |           |                     |                          |   |          |          |
|-------|------|-----------|---------------------|--------------------------|---|----------|----------|
| WB260 | 2020 | Korinthia | Athikia             | <i>Pica pica</i>         | 0 | 22,97966 | 37,86447 |
| WB261 | 2020 | Korinthia | Galataki            | <i>Pica pica</i>         | 0 | 22,89012 | 37,87865 |
| WB262 | 2020 | Korinthia | Athikia             | <i>Pica pica</i>         | 0 | 22,97966 | 37,86447 |
| WB263 | 2020 | Korinthia | Galataki            | <i>Pica pica</i>         | 0 | 22,92800 | 37,81394 |
| WB264 | 2020 | Korinthia | Galataki            | <i>Pica pica</i>         | 0 | 22,92800 | 37,81394 |
| WB265 | 2020 | Korinthia | Zeugolatio          | <i>Pica pica</i>         | 0 | 22,78766 | 37,93915 |
| WB266 | 2020 | Korinthia | Xilokeriza          | <i>Pica pica</i>         | 0 | 22,98200 | 37,89300 |
| WB267 | 2020 | Korinthia | Ancient Korinthos   | <i>Pica pica</i>         | 0 | 22,86484 | 37,90396 |
| WB268 | 2020 | Korinthia | Examilia            | <i>Pica pica</i>         | 0 | 22,92214 | 37,89460 |
| WB269 | 2020 | Korinthia | Korinthos           | <i>Pica pica</i>         | 0 | 22,93335 | 37,92938 |
| WB270 | 2020 | Korinthia | Poulitsa            | <i>Pica pica</i>         | 0 | 22,67839 | 38,00800 |
| WB271 | 2020 | Korinthia | Korinthos           | <i>Passer domesticus</i> | 0 | 22,93335 | 37,92938 |
| WB272 | 2020 | Korinthia | Athikia             | <i>Passer domesticus</i> | 0 | 22,92800 | 37,81394 |
| WB273 | 2020 | Korinthia | Korinthos           | <i>Passer domesticus</i> | 1 | 22,93441 | 37,92790 |
| WB274 | 2020 | Korinthia | Korinthos           | <i>Passer domesticus</i> | 0 | 22,93310 | 37,92930 |
| WB275 | 2020 | Korinthia | Korinthos           | <i>Passer domesticus</i> | 0 | 22,93441 | 37,92790 |
| WB276 | 2020 | Korinthia | Examilia            | <i>Passer domesticus</i> | 0 | 22,92214 | 37,89460 |
| WB277 | 2020 | Korinthia | Examilia            | <i>Passer domesticus</i> | 0 | 22,92214 | 37,89460 |
| WB278 | 2020 | Korinthia | Examilia            | <i>Passer domesticus</i> | 0 | 22,92214 | 37,89460 |
| WB279 | 2020 | Korinthia | Korinthos           | <i>Passer domesticus</i> | 1 | 22,93307 | 37,92936 |
| WB280 | 2020 | Korinthia | Korinthos           | <i>Passer domesticus</i> | 0 | 22,93310 | 37,92930 |
| WB281 | 2020 | Korinthia | Korinthos           | <i>Passer domesticus</i> | 0 | 22,93310 | 37,92930 |
| WB282 | 2020 | Korinthia | Korinthos           | <i>Passer domesticus</i> | 0 | 22,93310 | 37,92930 |
| WB283 | 2020 | Korinthia | Korinthos           | <i>Passer domesticus</i> | 0 | 22,93310 | 37,92930 |
| WB284 | 2020 | Korinthia | Korinthos           | <i>Passer domesticus</i> | 0 | 22,93310 | 37,92930 |
| WB285 | 2020 | Korinthia | Korinthos           | <i>Passer domesticus</i> | 0 | 22,93310 | 37,92930 |
| WB286 | 2020 | Korinthia | Korinthos           | <i>Passer domesticus</i> | 0 | 22,93310 | 37,92930 |
| WB287 | 2020 | Korinthia | Korinthos           | <i>Passer domesticus</i> | 0 | 22,93310 | 37,92930 |
| WB288 | 2020 | Korinthia | Korinthos           | <i>Passer domesticus</i> | 0 | 22,93310 | 37,92930 |
| WB289 | 2020 | Korinthia | Korinthos           | <i>Passer domesticus</i> | 0 | 22,93310 | 37,92930 |
| WB290 | 2020 | Korinthia | Korinthos           | <i>Passer domesticus</i> | 0 | 22,93310 | 37,92930 |
| WB291 | 2020 | Korinthia | Solomos             | <i>Passer domesticus</i> | 0 | 22,93335 | 37,92938 |
| WB292 | 2020 | Korinthia | Solomos             | <i>Passer domesticus</i> | 0 | 22,93335 | 37,92938 |
| WB293 | 2020 | Korinthia | Loutraki-Petrachora | <i>Pica pica</i>         | 0 | 22,98923 | 37,96188 |
| WB294 | 2020 | Korinthia | Examilia            | <i>Pica pica</i>         | 0 | 22,92214 | 37,89460 |
| WB295 | 2020 | Korinthia | Galataki            | <i>Pica pica</i>         | 0 | 22,92800 | 37,81394 |
| WB296 | 2020 | Korinthia | Galataki            | <i>Pica pica</i>         | 0 | 22,92800 | 37,81394 |
| WB297 | 2020 | Korinthia | Sikiona             | <i>Pica pica</i>         | 0 | 22,94580 | 37,91896 |
| WB298 | 2020 | Korinthia | Korinthos           | <i>Pica pica</i>         | 1 | 22,95046 | 37,91252 |
| WB299 | 2020 | Korinthia | Korinthos           | <i>Pica pica</i>         | 0 | 22,90774 | 37,92876 |
| WB300 | 2020 | Korinthia | Korinthos           | <i>Pica pica</i>         | 0 | 22,92293 | 37,92853 |
| WB301 | 2020 | Korinthia | Korinthos           | <i>Pica pica</i>         | 0 | 22,97202 | 37,92113 |
| WB302 | 2020 | Korinthia | Korinthos           | <i>Pica pica</i>         | 0 | 22,93000 | 37,91023 |
| WB303 | 2020 | Korinthia | Korinthos           | <i>Pica pica</i>         | 0 | 22,94344 | 37,92568 |
| WB304 | 2020 | Korinthia | Korinthos           | <i>Pica pica</i>         | 0 | 22,91322 | 37,91080 |
| WB305 | 2020 | Korinthia | Kiato               | <i>Pica pica</i>         | 1 | 22,73286 | 38,00008 |
| WB306 | 2020 | Korinthia | Kiato               | <i>Pica pica</i>         | 0 | 22,74068 | 38,00601 |
| WB307 | 2020 | Korinthia | Korinthos           | <i>Pica pica</i>         | 1 | 22,93441 | 37,92790 |
| WB308 | 2020 | Korinthia | Korinthos           | <i>Pica pica</i>         | 1 | 22,93310 | 37,92930 |
| WB309 | 2020 | Korinthia | Korinthos           | <i>Pica pica</i>         | 0 | 22,93307 | 37,92936 |
| WB310 | 2020 | Korinthia | Korinthos           | <i>Pica pica</i>         | 0 | 22,93572 | 37,92973 |
| WB311 | 2020 | Korinthia | Korinthos           | <i>Pica pica</i>         | 1 | 22,93335 | 37,92938 |

|       |      |           |                   |                              |   |          |          |
|-------|------|-----------|-------------------|------------------------------|---|----------|----------|
| WB312 | 2020 | Korinthia | Korinthos         | <i>Pica pica</i>             | 0 | 22,93335 | 37,92938 |
| WB313 | 2020 | Korinthia | Solomos           | <i>Pica pica</i>             | 1 | 22,89139 | 37,87025 |
| WB314 | 2020 | Korinthia | Korinthos         | <i>Pica pica</i>             | 0 | 22,89582 | 37,87923 |
| WB315 | 2020 | Korinthia | Solomos           | <i>Pica pica</i>             | 1 | 22,89575 | 37,87998 |
| WB316 | 2020 | Korinthia | Solomos           | <i>Pica pica</i>             | 1 | 22,88349 | 37,88479 |
| WB317 | 2020 | Korinthia | Solomos           | <i>Pica pica</i>             | 0 | 22,89012 | 37,87865 |
| WB318 | 2020 | Korinthia | Solomos           | <i>Pica pica</i>             | 0 | 22,88533 | 37,87756 |
| WB319 | 2020 | Korinthia | Solomos           | <i>Pica pica</i>             | 0 | 22,89298 | 37,88124 |
| WB320 | 2020 | Korinthia | Solomos           | <i>Pica pica</i>             | 0 | 22,88715 | 37,87627 |
| WB321 | 2020 | Korinthia | Solomos           | <i>Pica pica</i>             | 0 | 22,89299 | 37,88020 |
| WB322 | 2020 | Korinthia | Solomos           | <i>Pica pica</i>             | 1 | 22,88349 | 37,88479 |
| WB323 | 2020 | Korinthia | Galataki          | <i>Pica pica</i>             | 0 | 22,89012 | 37,87865 |
| WB324 | 2020 | Korinthia | Solomos           | <i>Pica pica</i>             | 0 | 22,89176 | 37,87979 |
| WB325 | 2020 | Korinthia | Examilia          | <i>Pica pica</i>             | 0 | 22,92214 | 37,89460 |
| WB326 | 2020 | Korinthia | Perigiali         | <i>Pica pica</i>             | 0 | 22,83519 | 37,94442 |
| WB327 | 2020 | Korinthia | Korinthos         | <i>Pica pica</i>             | 0 | 22,95046 | 37,91188 |
| WB328 | 2020 | Korinthia | Korinthos         | <i>Pica pica</i>             | 0 | 22,94850 | 37,91299 |
| WB329 | 2020 | Korinthia | Sikiona           | <i>Pica pica</i>             | 0 | 22,94580 | 37,91896 |
| WB330 | 2020 | Korinthia | Solomos           | <i>Pica pica</i>             | 0 | 22,93335 | 37,92938 |
| WB331 | 2020 | Korinthia | Korinthos         | <i>Pica pica</i>             | 0 | 22,93586 | 37,92952 |
| WB332 | 2020 | Korinthia | Korinthos         | <i>Pica pica</i>             | 0 | 22,94880 | 37,92483 |
| WB333 | 2020 | Korinthia | Korinthos         | <i>Streptopelia decaocto</i> | 0 | 22,94989 | 37,92579 |
| WB334 | 2020 | Korinthia | Korinthos         | <i>Streptopelia decaocto</i> | 0 | 22,95431 | 37,91133 |
| WB335 | 2020 | Korinthia | Nemea             | <i>Garrulus glandarius</i>   | 0 | 22,89900 | 37,92426 |
| WB336 | 2020 | Korinthia | Spathovouni       | <i>Larus michahellis</i>     | 0 | 22,89904 | 37,92402 |
| WB337 | 2020 | Korinthia | Chiliomodi        | <i>Parus major</i>           | 1 | 22,92766 | 37,92531 |
| WB338 | 2020 | Korinthia | Korinthos         | <i>Passer domesticus</i>     | 0 | 22,92579 | 37,92528 |
| WB339 | 2020 | Korinthia | Korinthos         | <i>Passer domesticus</i>     | 0 | 22,92591 | 37,92611 |
| WB340 | 2020 | Korinthia | Korinthos         | <i>Passer domesticus</i>     | 0 | 22,95600 | 37,91700 |
| WB341 | 2020 | Korinthia | Korinthos         | <i>Passer domesticus</i>     | 0 | 22,94900 | 37,92600 |
| WB342 | 2020 | Korinthia | Korinthos         | <i>Pica pica</i>             | 0 | 22,93334 | 37,92949 |
| WB343 | 2020 | Korinthia | Korinthos         | <i>Pica pica</i>             | 0 | 22,93537 | 37,92949 |
| WB344 | 2020 | Korinthia | Ancient Korinthos | <i>Pica pica</i>             | 0 | 22,94685 | 37,91297 |
| WB345 | 2020 | Korinthia | Xilokeriza        | <i>Pica pica</i>             | 0 | 22,93397 | 37,92757 |
| WB346 | 2020 | Korinthia | Korinthos         | <i>Pica pica</i>             | 0 | 22,93376 | 37,92711 |
| WB347 | 2020 | Korinthia | Korinthos         | <i>Pica pica</i>             | 0 | 22,93511 | 37,92939 |
| WB348 | 2020 | Korinthia | Lechaio           | <i>Pica pica</i>             | 0 | 22,85308 | 37,92634 |
| WB349 | 2020 | Korinthia | Examilia          | <i>Pica pica</i>             | 1 | 22,94888 | 37,91258 |
| WB350 | 2020 | Korinthia | Solomos           | <i>Pica pica</i>             | 1 | 22,89298 | 37,88124 |
| WB351 | 2020 | Korinthia | Solomos           | <i>Pica pica</i>             | 1 | 22,89298 | 37,88124 |
| WB352 | 2020 | Korinthia | Chiliomodi        | <i>Pica pica</i>             | 0 | 22,86849 | 37,79490 |
| WB353 | 2020 | Korinthia | Korinthos         | <i>Pica pica</i>             | 0 | 22,95431 | 37,91133 |
| WB354 | 2020 | Korinthia | Korinthos         | <i>Pica pica</i>             | 0 | 22,94344 | 37,92568 |
| WB355 | 2020 | Korinthia | Korinthos         | <i>Pica pica</i>             | 0 | 22,91322 | 37,91080 |
| WB356 | 2020 | Korinthia | Korinthos         | <i>Pica pica</i>             | 0 | 22,91524 | 37,91208 |
| WB357 | 2020 | Korinthia | Korinthos         | <i>Pica pica</i>             | 0 | 22,91765 | 37,90722 |
| WB358 | 2020 | Korinthia | Korinthos         | <i>Pica pica</i>             | 0 | 22,91732 | 37,90675 |
| WB359 | 2020 | Korinthia | Korinthos         | <i>Pica pica</i>             | 0 | 22,91804 | 37,90657 |
| WB360 | 2020 | Korinthia | Korinthos         | <i>Pica pica</i>             | 0 | 22,95431 | 37,91133 |
| WB361 | 2020 | Korinthia | Zeugolatio        | <i>Turdus merula</i>         | 0 | 22,80513 | 37,94452 |
| WB362 | 2020 | Lakonia   | Pakia             | <i>Pica pica</i>             | 0 | 22,83737 | 36,74970 |
| WB363 | 2020 | Lakonia   | Leimonas          | <i>Pica pica</i>             | 0 | 22,68227 | 36,82029 |
| WB364 | 2020 | Lakonia   | Stefania          | <i>Pica pica</i>             | 0 | 22,59412 | 36,83994 |
| WB365 | 2020 | Lakonia   | Gouves            | <i>Pica pica</i>             | 0 | 22,74810 | 36,84441 |



|       |      |         |                |                            |   |          |          |
|-------|------|---------|----------------|----------------------------|---|----------|----------|
| WB366 | 2020 | Lakonia | Gouves         | <i>Pica pica</i>           | 0 | 22,76038 | 36,85512 |
| WB367 | 2020 | Lakonia | Koupia         | <i>Pica pica</i>           | 0 | 22,90766 | 36,86226 |
| WB368 | 2020 | Lakonia | Peristeri      | <i>Pica pica</i>           | 0 | 22,68339 | 36,86584 |
| WB369 | 2020 | Lakonia | Grammoussa     | <i>Pica pica</i>           | 0 | 22,66107 | 36,90332 |
| WB370 | 2020 | Lakonia | Kalyvia Sochas | <i>Pica pica</i>           | 0 | 22,41113 | 37,02368 |
| WB371 | 2020 | Lakonia | Afisía         | <i>Pica pica</i>           | 0 | 22,02507 | 37,10463 |
| WB372 | 2020 | Lakonia | Vasara         | <i>Pica pica</i>           | 0 | 22,00799 | 37,17366 |
| WB373 | 2020 | Lakonia | Papadianika    | <i>Turdus merula</i>       | 0 | 22,87084 | 36,71124 |
| WB374 | 2020 | Lakonia | Voutianoí      | <i>Turdus philomelos</i>   | 0 | 22,05800 | 37,15423 |
| WB375 | 2020 | Lakonia | Sparti         | <i>Corvus cornix</i>       | 0 | 22,43219 | 37,05340 |
| WB376 | 2020 | Lakonia | Xirokeampi     | <i>Garrulus glandarius</i> | 0 | 22,47277 | 37,03849 |
| WB377 | 2020 | Lakonia | Sparti         | <i>Garrulus glandarius</i> | 0 | 22,47277 | 37,03849 |
| WB378 | 2020 | Lakonia | Molaoi         | <i>Garrulus glandarius</i> | 0 | 22,85899 | 36,81650 |
| WB379 | 2020 | Lakonia | Skala          | <i>Garrulus glandarius</i> | 0 | 22,87512 | 36,80010 |
| WB380 | 2020 | Lakonia | Elos           | <i>Passer domesticus</i>   | 0 | 22,70247 | 36,83123 |
| WB381 | 2020 | Lakonia | Elos           | <i>Passer domesticus</i>   | 0 | 22,70312 | 36,83065 |
| WB382 | 2020 | Lakonia | Elos           | <i>Passer domesticus</i>   | 1 | 22,70232 | 36,83131 |
| WB383 | 2020 | Lakonia | Elos           | <i>Passer domesticus</i>   | 1 | 22,70274 | 36,82913 |
| WB384 | 2020 | Lakonia | Elos           | <i>Passer domesticus</i>   | 0 | 22,69310 | 36,83479 |
| WB385 | 2020 | Lakonia | Skala          | <i>Passer domesticus</i>   | 0 | 22,70803 | 36,83339 |
| WB386 | 2020 | Lakonia | Skala          | <i>Passer domesticus</i>   | 0 | 22,70804 | 36,83287 |
| WB387 | 2020 | Lakonia | Skala          | <i>Passer domesticus</i>   | 0 | 22,70122 | 36,83781 |
| WB388 | 2020 | Lakonia | Skala          | <i>Passer domesticus</i>   | 0 | 22,70128 | 36,82911 |
| WB389 | 2020 | Lakonia | Skala          | <i>Passer domesticus</i>   | 0 | 22,70236 | 36,82937 |
| WB390 | 2020 | Lakonia | Skala          | <i>Passer domesticus</i>   | 1 | 22,67490 | 36,85456 |
| WB391 | 2020 | Lakonia | Elos           | <i>Passer domesticus</i>   | 0 | 22,70128 | 36,82911 |
| WB392 | 2020 | Lakonia | Elos           | <i>Passer domesticus</i>   | 0 | 22,70236 | 36,82937 |
| WB393 | 2020 | Lakonia | Elos           | <i>Passer domesticus</i>   | 0 | 22,70284 | 36,83669 |
| WB394 | 2020 | Lakonia | Skala          | <i>Passer domesticus</i>   | 0 | 22,67163 | 36,85772 |
| WB395 | 2020 | Lakonia | Elos           | <i>Passer domesticus</i>   | 0 | 22,67462 | 36,85775 |
| WB396 | 2020 | Lakonia | Magoulas       | <i>Pica pica</i>           | 0 | 22,41416 | 37,08370 |
| WB397 | 2020 | Lakonia | Stefania       | <i>Pica pica</i>           | 0 | 22,60735 | 36,84681 |
| WB398 | 2020 | Lakonia | Apídea         | <i>Pica pica</i>           | 0 | 22,79128 | 36,88550 |
| WB399 | 2020 | Lakonia | Vlachioti      | <i>Pica pica</i>           | 0 | 22,70940 | 36,87114 |
| WB400 | 2020 | Lakonia | Glykovryshi    | <i>Pica pica</i>           | 0 | 22,78831 | 36,79460 |
| WB401 | 2020 | Lakonia | Geraki         | <i>Pica pica</i>           | 0 | 22,69571 | 36,99285 |
| WB402 | 2020 | Lakonia | Amykles        | <i>Pica pica</i>           | 0 | 22,43538 | 37,02115 |
| WB403 | 2020 | Lakonia | Cythio         | <i>Pica pica</i>           | 0 | 22,52166 | 36,78198 |
| WB404 | 2020 | Lakonia | Chosiari       | <i>Pica pica</i>           | 0 | 22,50253 | 36,72104 |
| WB405 | 2020 | Lakonia | Dafni          | <i>Pica pica</i>           | 0 | 22,53198 | 36,93077 |
| WB406 | 2020 | Lakonia | Skala          | <i>Pica pica</i>           | 0 | 22,67924 | 36,84685 |
| WB407 | 2020 | Lakonia | Asopos         | <i>Pica pica</i>           | 0 | 22,67462 | 36,85775 |
| WB408 | 2020 | Lakonia | Agios Ioannis  | <i>Pica pica</i>           | 0 | 22,39525 | 37,05520 |
| WB409 | 2020 | Lakonia | Skouras        | <i>Pica pica</i>           | 0 | 22,49589 | 37,01932 |
| WB410 | 2020 | Lakonia | Molaoi         | <i>Pica pica</i>           | 0 | 22,87512 | 36,80010 |
| WB411 | 2020 | Lakonia | Molaoi         | <i>Pica pica</i>           | 1 | 22,94726 | 36,76736 |
| WB412 | 2020 | Lakonia | Molaoi         | <i>Pica pica</i>           | 0 | 22,86131 | 36,79523 |
| WB413 | 2020 | Lakonia | Sykea          | <i>Pica pica</i>           | 1 | 22,93870 | 36,76979 |
| WB414 | 2020 | Lakonia | Neapoli        | <i>Pica pica</i>           | 0 | 23,06700 | 36,50700 |
| WB415 | 2020 | Lakonia | Elos           | <i>Pica pica</i>           | 0 | 22,69310 | 36,83479 |
| WB416 | 2020 | Lakonia | Aphishia       | <i>Pica pica</i>           | 0 | 22,70803 | 36,83339 |
| WB417 | 2020 | Lakonia | Neapoli        | <i>Pica pica</i>           | 0 | 22,70804 | 36,83287 |
| WB418 | 2020 | Lakonia | Sykea          | <i>Pica pica</i>           | 0 | 22,70122 | 36,83781 |

|       |      |          |                   |                               |   |          |          |
|-------|------|----------|-------------------|-------------------------------|---|----------|----------|
| WB419 | 2020 | Lakonia  | Elos              | <i>Pica pica</i>              | 0 | 22,70128 | 36,82911 |
| WB420 | 2020 | Lakonia  | Amykles           | <i>Pica pica</i>              | 0 | 22,70236 | 36,82937 |
| WB421 | 2020 | Lakonia  | Sparti            | <i>Turdus merula</i>          | 0 | 22,70284 | 36,83669 |
| WB422 | 2020 | Lakonia  | Elos              | <i>Turdus merula</i>          | 0 | 22,70128 | 36,82911 |
| WB423 | 2020 | Lakonia  | Elos              | <i>Turdus merula</i>          | 0 | 22,69310 | 36,83479 |
| WB424 | 2020 | Lakonia  | Elos              | <i>Turdus merula</i>          | 0 | 22,70247 | 36,83123 |
| WB425 | 2020 | Lakonia  | Elos              | <i>Turdus merula</i>          | 0 | 22,70247 | 36,83123 |
| WB426 | 2020 | Messinia | Pyrgos            | <i>Buteo buteo</i>            | 0 | 22,45465 | 37,08512 |
| WB427 | 2020 | Messinia | Loggas            | <i>Pica pica</i>              | 0 | 21,90189 | 36,85229 |
| WB428 | 2020 | Messinia | Verga             | <i>Pica pica</i>              | 0 | 22,18118 | 36,98490 |
| WB429 | 2020 | Messinia | Verga             | <i>Pica pica</i>              | 0 | 22,17264 | 37,01315 |
| WB430 | 2020 | Messinia | Messini           | <i>Pica pica</i>              | 0 | 22,15913 | 36,99922 |
| WB431 | 2020 | Messinia | Messini           | <i>Pica pica</i>              | 0 | 21,71041 | 37,06474 |
| WB432 | 2020 | Messinia | Aris              | <i>Pica pica</i>              | 0 | 22,00331 | 37,10420 |
| WB433 | 2020 | Messinia | Androusa          | <i>Pica pica</i>              | 0 | 21,96531 | 37,12895 |
| WB434 | 2020 | Messinia | Aristodimio       | <i>Pica pica</i>              | 0 | 22,42452 | 37,15096 |
| WB435 | 2020 | Messinia | Arfara            | <i>Pica pica</i>              | 0 | 22,01800 | 37,16200 |
| WB436 | 2020 | Messinia | Skala             | <i>Pica pica</i>              | 0 | 22,04600 | 37,15000 |
| WB437 | 2020 | Messinia | Mauromati Ithomis | <i>Pica pica</i>              | 0 | 21,94214 | 37,21350 |
| WB438 | 2020 | Messinia | Neochori Ithomis  | <i>Pica pica</i>              | 0 | 22,31555 | 37,35970 |
| WB439 | 2020 | Messinia | Chora             | <i>Turdus merula</i>          | 0 | 21,70919 | 37,07934 |
| WB440 | 2020 | Messinia | Kalamata          | <i>Apus apus</i>              | 0 | 22,13146 | 37,02987 |
| WB441 | 2020 | Messinia | Gargalianoi       | <i>Bubo bubo</i>              | 0 | 21,69244 | 37,09285 |
| WB442 | 2020 | Messinia | Gargalianoi       | <i>Bubo bubo</i>              | 0 | 21,65937 | 37,11366 |
| WB443 | 2020 | Messinia | Gargalianoi       | <i>Columba livia</i>          | 0 | 21,62851 | 37,06173 |
| WB444 | 2020 | Messinia | Kalamata          | <i>Columba livia</i>          | 0 | 22,08786 | 37,04549 |
| WB445 | 2020 | Messinia | Kallithea         | <i>Corvus cornix</i>          | 0 | 21,79756 | 36,87606 |
| WB446 | 2020 | Messinia | Aristomenis       | <i>Garrulus glandarius</i>    | 0 | 21,83224 | 37,09349 |
| WB447 | 2020 | Messinia | Chora             | <i>Hirundo rustica</i>        | 0 | 21,72131 | 37,05400 |
| WB448 | 2020 | Messinia | Avia              | <i>Parus major</i>            | 1 | 22,14504 | 36,93336 |
| WB449 | 2020 | Messinia | Avia              | <i>Parus major</i>            | 0 | 22,14859 | 36,94511 |
| WB450 | 2020 | Messinia | Messini           | <i>Parus major</i>            | 1 | 22,03204 | 37,06804 |
| WB451 | 2020 | Messinia | Avia              | <i>Parus major</i>            | 0 | 22,03248 | 37,06805 |
| WB452 | 2020 | Messinia | Valira            | <i>Passer domesticus</i>      | 0 | 21,98368 | 37,15647 |
| WB453 | 2020 | Messinia | Valira            | <i>Passer domesticus</i>      | 0 | 21,98549 | 37,15684 |
| WB454 | 2020 | Messinia | Valira            | <i>Passer domesticus</i>      | 0 | 21,98509 | 37,15703 |
| WB455 | 2020 | Messinia | Valira            | <i>Passer domesticus</i>      | 0 | 21,98037 | 37,15604 |
| WB456 | 2020 | Messinia | Arfara            | <i>Passer domesticus</i>      | 0 | 21,98518 | 37,15704 |
| WB457 | 2020 | Messinia | Valira            | <i>Passer domesticus</i>      | 0 | 21,98518 | 37,15704 |
| WB458 | 2020 | Messinia | Valira            | <i>Passer domesticus</i>      | 0 | 21,98400 | 37,15700 |
| WB459 | 2020 | Messinia | Loggas            | <i>Passer domesticus</i>      | 0 | 21,90407 | 36,86897 |
| WB460 | 2020 | Messinia | Valira            | <i>Passer domesticus</i>      | 0 | 21,98400 | 37,15700 |
| WB461 | 2020 | Messinia | Filiatra          | <i>Passer domesticus</i>      | 0 | 21,57766 | 37,15906 |
| WB462 | 2020 | Messinia | Filiatra          | <i>Passer domesticus</i>      | 0 | 21,59315 | 37,16116 |
| WB463 | 2020 | Messinia | Kalamata          | <i>Passer hispaniolensis</i>  | 1 | 22,04387 | 37,05189 |
| WB464 | 2020 | Messinia | Kalamata          | <i>Passer hispaniolensis</i>  | 1 | 22,06571 | 37,04948 |
| WB465 | 2020 | Messinia | Mikromani         | <i>Passer hispaniolensis</i>  | 0 | 22,07960 | 37,05256 |
| WB466 | 2020 | Messinia | Kalamata          | <i>Passer montanus</i>        | 0 | 22,03194 | 37,06763 |
| WB467 | 2020 | Messinia | Mikromani         | <i>Passer montanus</i>        | 0 | 22,02034 | 37,08728 |
| WB468 | 2020 | Messinia | Mikromani         | <i>Passer montanus</i>        | 0 | 22,01886 | 37,08686 |
| WB469 | 2020 | Messinia | Mikromani         | <i>Passer montanus</i>        | 0 | 22,03454 | 37,08181 |
| WB470 | 2020 | Messinia | Messini           | <i>Phylloscopus collybita</i> | 0 | 21,98981 | 37,05461 |

|       |      |          |              |                              |   |          |          |
|-------|------|----------|--------------|------------------------------|---|----------|----------|
| WB471 | 2020 | Messinia | Verga        | <i>Pica pica</i>             | 0 | 22,15913 | 36,99922 |
| WB472 | 2020 | Messinia | Avia         | <i>Pica pica</i>             | 0 | 22,15148 | 36,96640 |
| WB473 | 2020 | Messinia | Konstantinoi | <i>Pica pica</i>             | 0 | 21,94457 | 37,29043 |
| WB474 | 2020 | Messinia | Meligalas    | <i>Pica pica</i>             | 0 | 21,96911 | 37,21778 |
| WB475 | 2020 | Messinia | Madeni       | <i>Pica pica</i>             | 0 | 21,96040 | 37,03961 |
| WB476 | 2020 | Messinia | Filiatra     | <i>Pica pica</i>             | 0 | 21,60372 | 37,15501 |
| WB477 | 2020 | Messinia | Kyparissia   | <i>Pica pica</i>             | 0 | 21,65666 | 37,23346 |
| WB478 | 2020 | Messinia | Verga        | <i>Pica pica</i>             | 0 | 22,15769 | 36,99786 |
| WB479 | 2020 | Messinia | Kopanaki     | <i>Pica pica</i>             | 0 | 21,81824 | 37,29500 |
| WB480 | 2020 | Messinia | Gargalianoi  | <i>Pica pica</i>             | 0 | 21,64257 | 37,06133 |
| WB481 | 2020 | Messinia | Valira       | <i>Pica pica</i>             | 1 | 21,98439 | 37,15707 |
| WB482 | 2020 | Messinia | Loggas       | <i>Pica pica</i>             | 0 | 21,90487 | 36,87373 |
| WB483 | 2020 | Messinia | Antikalamos  | <i>Pica pica</i>             | 0 | 22,06589 | 37,06778 |
| WB484 | 2020 | Messinia | Piperitsa    | <i>Pica pica</i>             | 0 | 22,00034 | 37,07810 |
| WB485 | 2020 | Messinia | Gargalianoi  | <i>Pica pica</i>             | 0 | 21,64257 | 37,06133 |
| WB486 | 2020 | Messinia | Arios        | <i>Pica pica</i>             | 0 | 21,94457 | 37,11825 |
| WB487 | 2020 | Messinia | Messini      | <i>Curruca communis</i>      | 1 | 22,03248 | 37,06805 |
| WB488 | 2020 | Messinia | Messini      | <i>Turdus merula</i>         | 0 | 22,00960 | 37,03581 |
| WB489 | 2020 | Messinia | Kalamata     | <i>Turdus merula</i>         | 0 | 22,06571 | 37,04948 |
| WB490 | 2020 | Messinia | Pilos        | <i>Ardea purpurea</i>        | 1 | 21,67659 | 36,97247 |
| WB491 | 2020 | Messinia | Gargalianoi  | <i>Athene noctua</i>         | 1 | 21,63248 | 37,06854 |
| WB492 | 2020 | Messinia | Alonia       | <i>Curruca melanocephala</i> | 0 | 21,99436 | 37,13176 |
| WB493 | 2020 | Messinia | Filiatra     | <i>Srix aluco</i>            | 1 | 21,58128 | 37,18062 |

0; negative PCR result, 1; positive PCR result

**Table S3.** Collection sites of mosquito pools

| Number of Trap | Regional Unit | Trap Fixed Location | Environment                       | Number of positive mosquito pools | WGS84_X   | WGS84_Y  |
|----------------|---------------|---------------------|-----------------------------------|-----------------------------------|-----------|----------|
| 1              | Lakonia       | Asteri              | Natural Wetland                   | 0                                 | 22,730213 | 36,82435 |
| 2              | Lakonia       | Leimonas            | Agricultural                      | 0                                 | 22,681031 | 36,82216 |
| 3              | Lakonia       | Trinisa             | Natural Wetland                   | 1                                 | 22,613164 | 36,81997 |
| 4              | Lakonia       | Skala               | Natural Wetland /<br>Agricultural | 1                                 | 22,660495 | 36,85241 |
| 5              | Lakonia       | St. George          | Natural Wetland /<br>Agricultural | 1                                 | 22,67698  | 36,85411 |
| 6              | Lakonia       | Leimonas            | Natural Wetland /<br>Agricultural | 0                                 | 22,679508 | 36,82514 |
| 7              | Lakonia       | Elos                | Residential                       | 0                                 | 22,696484 | 36,83294 |
| 8              | Lakonia       | Elos                | Agricultural                      | 1                                 | 22,697697 | 36,82916 |
| 9              | Argolida      | Timenio             | Natural Wetland                   | 1                                 | 22,730008 | 37,59112 |
| 10             | Argolida      | Monastiraki         | Agricultural                      | 0                                 | 22,747912 | 37,70375 |
| 11             | Argolida      | Laloukas            | Agricultural                      | 2                                 | 22,783149 | 37,62889 |
| 12             | Argolida      | Koutsopodi          | Residential                       | 0                                 | 22,709225 | 37,68324 |
| 13             | Argolida      | Nafplio             | Natural Wetland                   | 0                                 | 22,799845 | 37,58422 |
| 14             | Argolida      | Fixti               | Agricultural                      | 2                                 | 22,722568 | 37,72408 |
| 15             | Argolida      | Dalamanara          | Agricultural                      | 1                                 | 22,768875 | 37,62468 |
| 16             | Argolida      | Nea Tirintha        | Agricultural                      | 1                                 | 22,819047 | 37,6109  |
| 17             | Argolida      | Era                 | Agricultural                      | 0                                 | 22,760489 | 37,65435 |
| 18             | Argolida      | Anyphi              | Agricultural                      | 0                                 | 22,782189 | 37,66084 |
| 19             | Korinthia     | Korinthos           | Residential                       | 0                                 | 22,933776 | 37,93555 |
| 20             | Korinthia     | Ancient Korinthos   | Agricultural                      | 1                                 | 22,875762 | 37,9032  |
| 21             | Korinthia     | Vrachai             | Agricultural                      | 0                                 | 22,804221 | 37,95528 |
| 22             | Korinthia     | Solomos             | Agricultural                      | 0                                 | 22,887904 | 37,87415 |
| 23             | Korinthia     | Chiliomodi          | Agricultural                      | 1                                 | 22,871798 | 37,81501 |
| 24             | Korinthia     | Lechaio             | Agricultural                      | 2                                 | 22,841537 | 37,92017 |
| 25             | Messinia      | Kalamata            | Natural Wetland /<br>Agricultural | 0                                 | 22,064313 | 37,03398 |
| 26             | Messinia      | Asprochoma          | Natural Wetland /<br>Agricultural | 0                                 | 22,072015 | 37,04786 |

|    |          |                 |                                   |   |            |          |
|----|----------|-----------------|-----------------------------------|---|------------|----------|
| 27 | Messinia | Mikromani       | Agricultural                      | 1 | 22,0296    | 37,07606 |
| 28 | Messinia | Aris            | Agricultural                      | 0 | 22,004018  | 37,09883 |
| 29 | Messinia | Messini Airport | Natural Wetland                   | 0 | 22,017536  | 37,05759 |
| 30 | Arcadia  | Tripoli         | Agricultural                      | 3 | 22,384984  | 37,49745 |
| 31 | Arcadia  | St. Vasileios   | Agricultural                      | 1 | 22,425658  | 37,51151 |
| 32 | Arcadia  | Kato Vervena    | Natural Wetland                   | 0 | 22,747183  | 37,44126 |
| 33 | Arcadia  | Neochori        | Natural Wetland /<br>Agricultural | 0 | 22,75071   | 37,37319 |
| 34 | Arcadia  | Paralio Astro   | Residential                       | 1 | 22,757428  | 37,4077  |
| 35 | Arcadia  | St. Andrews     | Natural Wetland                   | 1 | 22,7830835 | 37,37144 |

**Table S4.** Environmental variables.

| <b>Environmental variable</b>                               | <b>Code</b> |
|-------------------------------------------------------------|-------------|
| Annual mean temperature (°C)                                | clima1      |
| Maximum temperature of warmest month (°C)                   | clima5      |
| Mean temperature of wettest quarter (°C)                    | clima8      |
| Mean temperature of driest quarter (°C)                     | clima9      |
| Mean temperature of warmest quarter (°C)                    | clima10     |
| Mean temperature of coldest quarter (°C)                    | clima11     |
| Total annual precipitation (mm)                             | clima12     |
| Altitude (m)                                                | dem         |
| Distance from water collections (m)                         | waterdis    |
| Livestock densities (sheep, goats, cattle/km <sup>2</sup> ) | sheepd      |
| Land uses (44 classes)                                      | landcorine  |
| Human population density (people/km <sup>2</sup> )          | popden      |
| April NDVI <sup>1</sup>                                     | aprndvi     |
| May NDVI                                                    | mayndvi     |

<sup>1</sup>NDVI: normalized difference vegetation index

**Table S5.** Categories of land uses.

| Categories of Land Uses       |                                                 |                                                                                        | Code |
|-------------------------------|-------------------------------------------------|----------------------------------------------------------------------------------------|------|
| 1st Level                     | 2nd Level                                       | 3rd Level                                                                              |      |
| Artificial surfaces           | Urban fabric                                    | Continuous urban fabric                                                                | 1    |
|                               |                                                 | Discontinuous urban fabric                                                             | 2    |
|                               | Industrial, commercial and transport units      | Industrial or commercial units                                                         | 3    |
|                               |                                                 | Road and rail networks and associated land                                             | 4    |
|                               |                                                 | Port areas                                                                             | 5    |
|                               |                                                 | Airports                                                                               | 6    |
|                               | Mine, dump and construction sites               | Mineral extraction sites                                                               | 7    |
|                               |                                                 | Dump sites                                                                             | 8    |
|                               |                                                 | Construction sites                                                                     | 9    |
|                               | Artificial, non-agricultural vegetated areas    | Green urban areas                                                                      | 10   |
|                               |                                                 | Sport and leisure facilities                                                           | 11   |
| Agricultural areas            | Arable land                                     | Non-irrigated arable land                                                              | 12   |
|                               |                                                 | Permanently irrigated land                                                             | 13   |
|                               |                                                 | Rice fields                                                                            | 14   |
|                               | Permanent crops                                 | Vineyards                                                                              | 15   |
|                               |                                                 | Fruit trees and berry plantations                                                      | 16   |
|                               |                                                 | Olive groves                                                                           | 17   |
|                               |                                                 | Pastures                                                                               | 18   |
|                               | Heterogeneous agricultural areas                | Annual crops associated with permanent crops                                           | 19   |
|                               |                                                 | Complex cultivation patterns                                                           | 20   |
|                               |                                                 | Land principally occupied by agriculture, with significant areas of natural vegetation | 21   |
|                               |                                                 | Agro-forestry areas                                                                    | 22   |
| Forest and semi natural areas | Forests                                         | Broad-leaved forest                                                                    | 23   |
|                               |                                                 | Coniferous forest                                                                      | 24   |
|                               |                                                 | Mixed forest                                                                           | 25   |
|                               |                                                 | Natural grasslands                                                                     | 26   |
|                               | Scrub and/or herbaceous vegetation associations | Moors and heathland                                                                    | 27   |
|                               |                                                 | Sclerophyllous vegetation                                                              | 28   |
|                               |                                                 | Transitional woodland-shrub                                                            | 29   |
|                               |                                                 | Beaches, dunes, sands                                                                  | 30   |
|                               | Open spaces with little or no vegetation        | Bare rocks                                                                             | 31   |
|                               |                                                 | Sparsely vegetated areas                                                               | 32   |
|                               |                                                 | Burnt areas                                                                            | 33   |
|                               |                                                 | Glaciers and perpetual snow                                                            | 34   |
| Wetlands                      | Inland wetlands                                 | Inland marshes                                                                         | 35   |
|                               |                                                 | Peat bogs                                                                              | 36   |
|                               |                                                 | Salt marshes                                                                           | 37   |
|                               | Maritime wetlands                               | Salines                                                                                | 38   |
|                               |                                                 | Intertidal flats                                                                       | 39   |
| Water bodies                  | Inland waters                                   | Water courses                                                                          | 40   |
|                               |                                                 | Water bodies                                                                           | 41   |
|                               |                                                 | Coastal lagoons                                                                        | 42   |
|                               | Marine waters                                   | Estuaries                                                                              | 43   |
|                               |                                                 | Sea and ocean                                                                          | 44   |
